# Supplementary material for: Increased risk of obstructive sleep apnoea in women with polycystic ovary syndrome: a population-based cohort study
Source: PubMed Central journal article supplement (PMC6410684; doi:10.1530/eje-18-0693), 2019-02-13
Supplement: supplementary_data_2.pdf [file supplementary_data_2.pdf]

## Panel E1. Options for methodical selection of Read codes

### Options for methodical selection of Read codes

- System based grouping
- Use of flags in prioritizing codes into difference hierarchy based on relevance
- Read codes cited in previous studies
- Read codes listed in Clinical codes.org
- Read codes corresponding to Quality Outcome Framework (QoF)
- Applying search for key words
- Discussion within the team (First attempt)
- Discussion with GPs
