# Supplementary material for: Increased risk of obstructive sleep apnoea in women with polycystic ovary syndrome: a population-based cohort study
Source: PubMed Central journal article supplement (PMC6410684; doi:10.1530/eje-18-0693), 2019-02-13
Supplement: supplementary_data_3.pdf [file supplementary_data_3.pdf]

**Table E1: Read codes used to identify polycystic ovary syndrome**

| Read Code                        | Description                      |
|----------------------------------|----------------------------------|
| <b>Polycystic ovary syndrome</b> |                                  |
| C164.11                          | Iso-sexual virilisation          |
| C164.12                          | Stein - Leventhal syndrome       |
| C165.00                          | Polycystic ovarian syndrome      |
| 7E25300                          | Endoscopic drilling of ovary     |
| <b>Polycystic ovaries</b>        |                                  |
| C164.00                          | Polycystic ovaries               |
| C164.13                          | Multi-cystic ovaries             |
| <b>Sleep apnoea</b>              |                                  |
| Fy03.00                          | Sleep apnoea                     |
| Fy03.11                          | Obstructive sleep apnoea         |
| Fy04.11                          | Ondine's curse                   |
| H5B..00                          | Sleep apnoea                     |
| H5B0.00                          | Obstructive sleep apnoea         |
| R005100                          | [D]Insomnia with sleep apnoea    |
| R005300                          | [D]Hypersomnia with sleep apnoea |
| R005311                          | [D]Sleep apnoea syndrome         |
| R005312                          | [D]Syndrome sleep apnoea         |
| R060400                          | [D]Apnoea                        |
