# Supplementary material for: Increased risk of obstructive sleep apnoea in women with polycystic ovary syndrome: a population-based cohort study
Source: PubMed Central journal article supplement (PMC6410684; doi:10.1530/eje-18-0693), 2019-02-13
Supplement: supplementary_data_5.pdf [file supplementary_data_5.pdf]

**E3 Table: Subgroup analysis for hazard of women with PCOS to develop OSA compared to women without PCOS stratified by BMI category**

|                                         | <b>BMI &lt;25kg/m2</b>    |                                 | <b>25-29.99 Kg/m2</b>     |                                 | <b>≥30Kg/m2</b>           |                                 |
|-----------------------------------------|---------------------------|---------------------------------|---------------------------|---------------------------------|---------------------------|---------------------------------|
|                                         | <b>PCOS<br/>(Exposed)</b> | <b>Controls<br/>(Unexposed)</b> | <b>PCOS<br/>(Exposed)</b> | <b>Controls<br/>(Unexposed)</b> | <b>PCOS<br/>(Exposed)</b> | <b>Controls<br/>(Unexposed)</b> |
| Total number of participants            | 25,725                    | 52,651                          | 15,035                    | 29,656                          | 23,912                    | 37,409                          |
| Person years                            | 117,924                   | 243,863                         | 72,979                    | 144,545                         | 117,242                   | 186,177                         |
| Incident OSA n (%)                      | 14 (0.05)                 | 15 (0.03)                       | 30 (0.20)                 | 26 (0.09)                       | 227 (0.94)                | 176 (0.47)                      |
| Incidence rates per 10,000 person years | 1.19                      | 0.62                            | 4.1                       | 1.80                            | 19.4                      | 9.45                            |
| Hazard Ratio (95% CI)                   | 1.92 (0.92 - 3.97)        |                                 | 2.25 (1.33 - 3.81)        |                                 | 2.05 (1.68 - 2.49)        |                                 |
| p-value                                 | 0.080                     |                                 | 0.002                     |                                 | <0.001                    |                                 |
| Adjusted Hazard Ratio (95% CI)*         | 1.91 (0.92 - 3.97)        |                                 | 2.25 (1.33 - 3.81)        |                                 | 2.10 (1.72 - 2.56)        |                                 |
| p-value                                 | 0.081                     |                                 | 0.003                     |                                 | <0.001                    |                                 |

\* Adjusted for age, Townsend score, BMI, diabetes or impaired glucose regulation and hypothyroidism at baseline
